# Supplementary material
Source: PubMed Central journal article supplement (PMC3336993)
Supplement: JCI61976sd.pdf [file JCI61976sd.pdf]

**Supplemental Table 1. Skin biopsy sites and molecular findings**

| <b>Patient and designation of the biopsy</b> | <b>Phenotype and biopsy site</b> | <b>Kindlin-1 expression in immunofluorescence staining</b> | <b>Sequence analysis of DNA from microdissected keratinocytes</b> |
|----------------------------------------------|----------------------------------|------------------------------------------------------------|-------------------------------------------------------------------|
| Patient 1 - P1-1                             | affected – left upper arm        | -                                                          | c.456dupA homozygous                                              |
| Patient 1 - P1-2                             | unaffected – right upper arm     | +                                                          | c.456dupA and normal sequence*                                    |
| Patient 1 - P1-3                             | unaffected – left upper arm      | +                                                          | c.456dupA heterozygous and homozygous normal sequence             |
| Patient 1 - P1-4                             | unaffected – left upper leg      | +                                                          | c.456dupA heterozygous                                            |
| <hr/>                                        |                                  |                                                            |                                                                   |
| Patient 2 - P2-1                             | affected – right lower leg       | -                                                          | c.676dupC homozygous                                              |
| Patient 2 - P2-2                             | unaffected – right hand          | +                                                          | c.676dupC heterozygous and homozygous normal sequence             |
| Patient 2 - P2-3                             | unaffected – right lower leg     | +                                                          | c.676dupC and normal sequence*                                    |

Legend: -, negative staining; +, positive staining; \* both mutant and normal sequences were identified by direct sequencing of cloned PCR products. The ratio between mutant and normal sequences was about 1:1.

**Supplemental Table 2. SNPs in *FERMT1* and neighbouring regions which were analyzed in DNA from patients' lymphocytes**

| No. | SNP Reference*     | Location on chromosome 20 | Primer sequence 5'-3'                                       | Sequence variants |              |
|-----|--------------------|---------------------------|-------------------------------------------------------------|-------------------|--------------|
|     |                    |                           |                                                             | Patient 1         | Patient 2    |
| 1.  | rs6083461          | 2,476,778                 | F: TGACTTTGTGATCCGTCTGC<br>R: CGCTGTCGTTGACTGCTCT           | <u>A / T</u>      | A / A        |
| 2.  | rs1178015          | 2,996,423                 | F: CCCCATGCTCTCACACTCTT<br>R: CTTTCAGGTGGTAAAAAGTACAGAA     | T / T             | <u>A / T</u> |
| 3.  | rs979332           | 3,381,044                 | F: GAAGCCAACAACACAGCAG<br>R: TCTGGACACTGCTCACAGC            | G / G             | <u>A / G</u> |
| 4.  | rs2253977          | 3,939,140                 | F: GAGAATCGCTTGAACCCAGA<br>R: AAATCTCCACAATTGGCTCA          | <u>A / G</u>      | <u>A / G</u> |
| 5.  | rs297765           | 4,440,642                 | F: TGCACCAAGTGTGAATAAGATAGA<br>R: TTCAAGGTTTCGTCCATTCA      | <u>A / G</u>      | G / G        |
| 6.  | <b>rs261360</b>    | <b>4,991,577</b>          | <b>F: TGGAGGTTAGGTTTCCACA<br/>R: GGCTTTTTCACATATCCCTGTT</b> | <u>A / G</u>      | <u>A / G</u> |
| 7.  | rs881118           | 5,903,388                 | F: AGCCTCTATCCCTCCGACAG<br>R: CTCAGAGGTGGCATCTTCCT          | A / A             | A / A        |
| 8.  | rs236152           | 5,903,848                 | F: GAGGAAGATGCCACTCTGA<br>R: GCCCCTCTCTTCTCACTTT            | C / C             | <u>C / G</u> |
| 9.  | rs236153           | 5,903,894                 | F: CGACAGGTCCTCTCAAGGAG<br>R: TGTCTTCACCCAAGAACCT           | A / A             | <u>A / G</u> |
| 10. | rs6117011          | 5,922,830                 | F: CGGCAGCCTCTAAATGTCTT<br>R: CACCACCCCATAAATCTCAG          | C / C             | C / C        |
| 11. | rs454422           | 5,943,693                 | F: ACAAGTGCCTGTGTGGCATA<br>R: CAGGCACAGGACACTGAATG          | C / C             | <u>A / C</u> |
| 12. | rs3897510          | 6,086,440                 | F: TCCTTCACTCTCTGCCACCT<br>R: AACCACACCCCTCAACCAGAG         | T / T             | T / T        |
| 13. | rs1774886          | 6,085,395                 | F: GCAACAAAACAAGATGTGC<br>R: GCAGGAGGCCTTCTTATTC            | A / A             | A / A        |
| 14. | rs6038397          | 6,195,009                 | F: TGGCTTCTCCATGAATTTCC<br>R: CACCACGTTCTCCCTCAAGT          | G / G             | G / G        |
| 15. | rs10485704         | 6,188,751                 | F: AAGGAATTGTAAAACAAGGAGTGAA<br>R: ACACCCAGGTGTCAGGAGAG     | T / T             | T / T        |
| 16. | rs117807751        | 6,028,870                 | F: ACTCTTCCACCCCTTTACC<br>R: GCCAGAGGTATAAATTTGGGAGT        | G / G             | G / G        |
| 17. | rs6085364          | 6,029,199                 | F: AGTTCTGGGCCCTCATCTCT<br>R: TCCCCTTCCCTAAAGCCTAA          | C / C             | C / C        |
| 18. | rs78109936         | 6,029,216                 | F: CAGATGTGGAGCCAAACTGC<br>R: TTGCAGCAATCCAGATAGGG          | T / T             | T / T        |
| 19. | rs6076920          | 6,029,317                 | F: CTCTCCTCCTCCAAGTTCA<br>R: CTTCTGGCTAGGCCTTCTT            | C / C             | C / C        |
| 20. | <b>rs55666319</b>  | <b>6,090,969</b>          | <b>F: CACAGTGCCAGCTTGACT<br/>R: CACAATCCCTAGGCCTACCA</b>    | T / T             | T / T        |
| 21. | <b>rs41308641</b>  | <b>6,093,116</b>          | <b>F: GGAGGTCTCTGTTCCCTTT<br/>R: GCCTTTCCTCATACAATCAG</b>   | T / T             | T / T        |
| 22. | <b>rs16991866</b>  | <b>6,093,177</b>          | <b>F: GGAGGTCTGTTCCCTTT<br/>R: GCCTTTCCTCATACAATCAG</b>     | T / T             | T / T        |
| 23. | <b>rs2295435</b>   | <b>6,096,695</b>          | <b>F: CTCAGGACCCCTCAAGCT<br/>R: CTTGAAGTAGGCAGAATGCAC</b>   | <b>G / G</b>      | <b>G / G</b> |
| 24. | <b>rs10373</b>     | <b>6,100,088</b>          | <b>F: GGAACCTTGCAGAGTGTTTTG<br/>R: GCTCTCCAGGGCATTACAAG</b> | T / T             | T / T        |
| 25. | <b>rs147571188</b> | <b>6,100,252</b>          | <b>F: GGAACCTTGCAGAGTGTTTTG<br/>R: GCTCTCCAGGGCATTACAAG</b> | C / C             | C / C        |
| 26. | rs16991945         | 6,136,965                 | F: GACCTGGCTCTCAAGGAAAA<br>R: TACAGTTCTGTGCCCTGTGC          | T / T             | T / T        |
| 27. | rs11907023         | 6,137,478                 | F: CCTTCAAAGCATACCAACAAGC<br>R: TTTGTGTGGAATTGGTGGTG        | C / C             | C / C        |
| 28. | rs112184907        | 6,137,505                 | F: CATCAGCTTCAGTTCACATTACC<br>R: TTTGTGTGGAATTGGTGGTG       | ins AA homo       | ins AA homo  |
| 29. | rs112281423        | 6,138,928                 | F: CATGGCTGATTAATGCTGAG<br>R: GCGCTGTACAGAGGACATGA          | G / G             | G / G        |
| 30. | rs1157366          | 7,019,980                 | F: TGTGCACACCATCACTGGTA<br>R: TGTTGAATAAGAAATACGACAGCAA     | A / A             | A / A        |
| 31. | rs2326931          | 7,398,383                 | F: TTTCTTCCAATCCATGCACA<br>R: CCCACTTTCACCCCTGTTATT         | <u>A / G</u>      | A / A        |
| 32. | rs6086473          | 8,484,107                 | F: AAATGCCAATCTGGTCAAGTG<br>R: CTCAGACCCCAACCCTATT          | C / C             | <u>C / T</u> |

|     |           |           |                                                                    |              |       |
|-----|-----------|-----------|--------------------------------------------------------------------|--------------|-------|
| 33. | rs6056209 | 8,836,771 | F: AACCC <sup>*</sup> TTTCTTCCCTTCTGTTC<br>R: CAAGTGATTCACCAGCCTCA | G / G        | G / G |
| 34. | rs2072952 | 9,525,601 | F: CCCAGGGTGCAGTATGTTCT<br>R: TGTCTCAACTCCTGCTGCTT                 | <u>A / G</u> | A / A |

Legend:\*, SNP reference ID according to NCBI, framed; the SNP analyzed in microdissected keratinocytes; in bold, SNPs within *FERMT1*; underlined, heterozygous SNPs; grey background, the homozygous interval.

### Supplemental Table 3. *FERMT1* primers used in this study for nested PCR

| Primer    | Sequence 5'-3'           |
|-----------|--------------------------|
| 4F        | GGAGGTCTCTGTTCCCCTTT     |
| 4R        | GCCTTTCCTCATCACATCAG     |
| 5F        | CACAGTGCCCAGCTTGACT      |
| 5R        | CACAATCCCTAGGCCTACCA     |
| 4F nested | GGTCTCTGTTCCCCTTTCCCCTTC |
| 4R nested | GGTGGGGGTGGGAGGAGAGATAT  |
| 5F nested | TGGTGCCAAATTTAAAGTCAA    |
| 5R nested | ACTGTGTCGGCACTAGCTCA     |

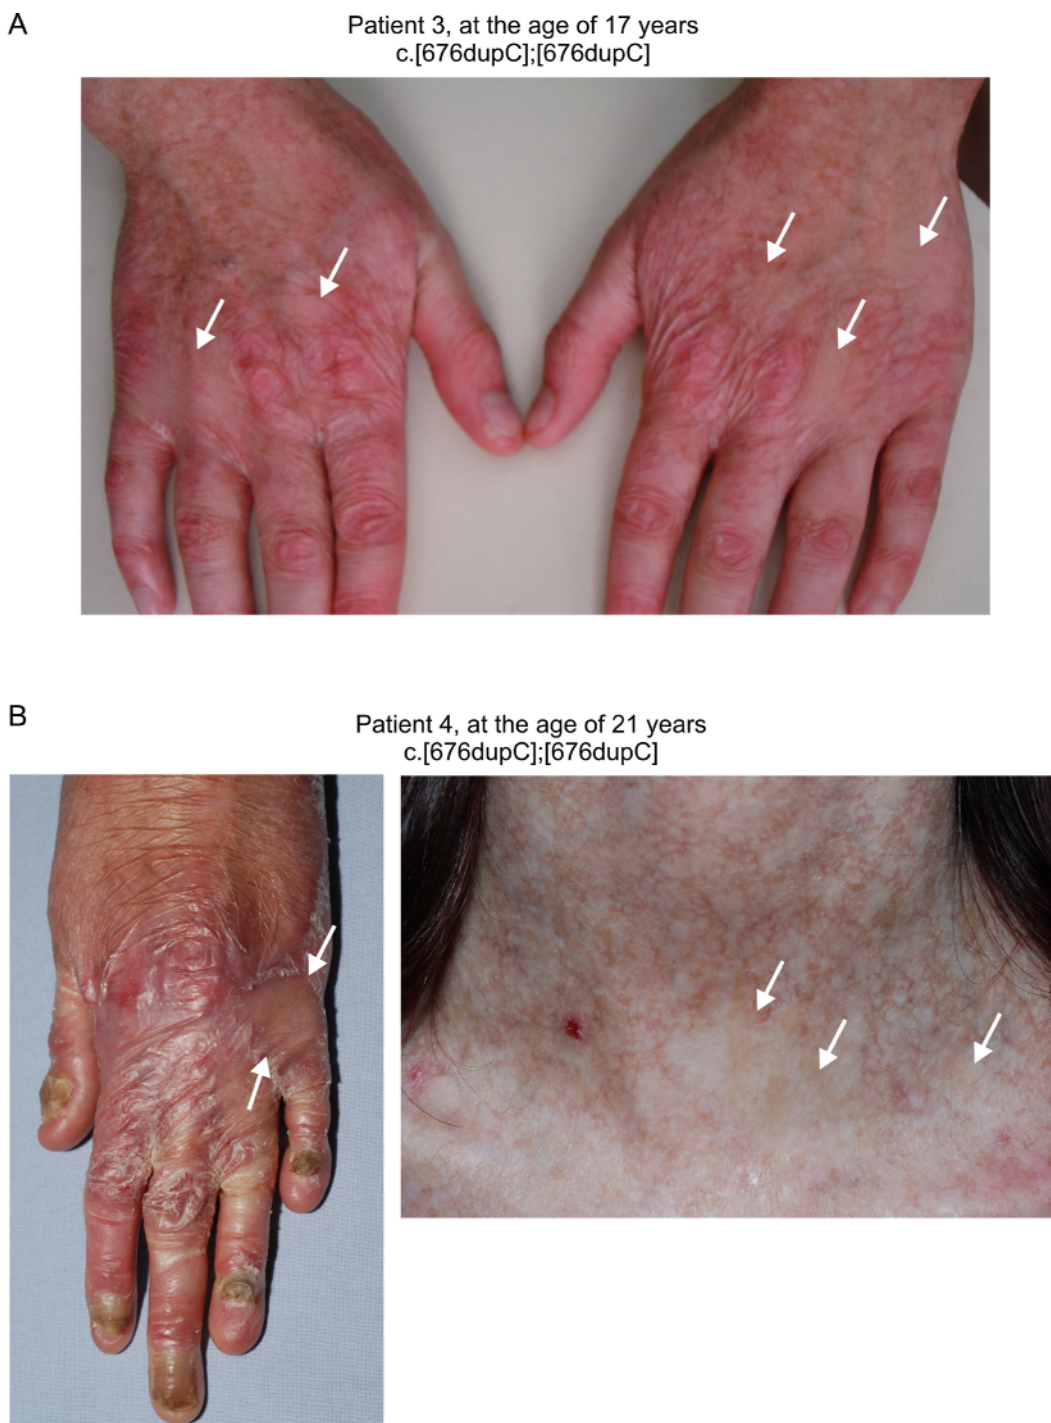

**Supplemental Figure 1. Clinical evidence for revertant mosaicism in patients 3 and 4.**

Hands of patient 3 at the age of 17 years (**A**) and the left hand and the neck of patient 4 at the age of 21 years (**B**) exhibit normal-appearing skin patches. In each panel, the age at examination and the inherited *FERMT1* mutations are indicated. Areas with clinical features of reversion, namely normal skin texture and absence of atrophy, are pointed out by white arrows. Further clinical features are listed in Table 1.

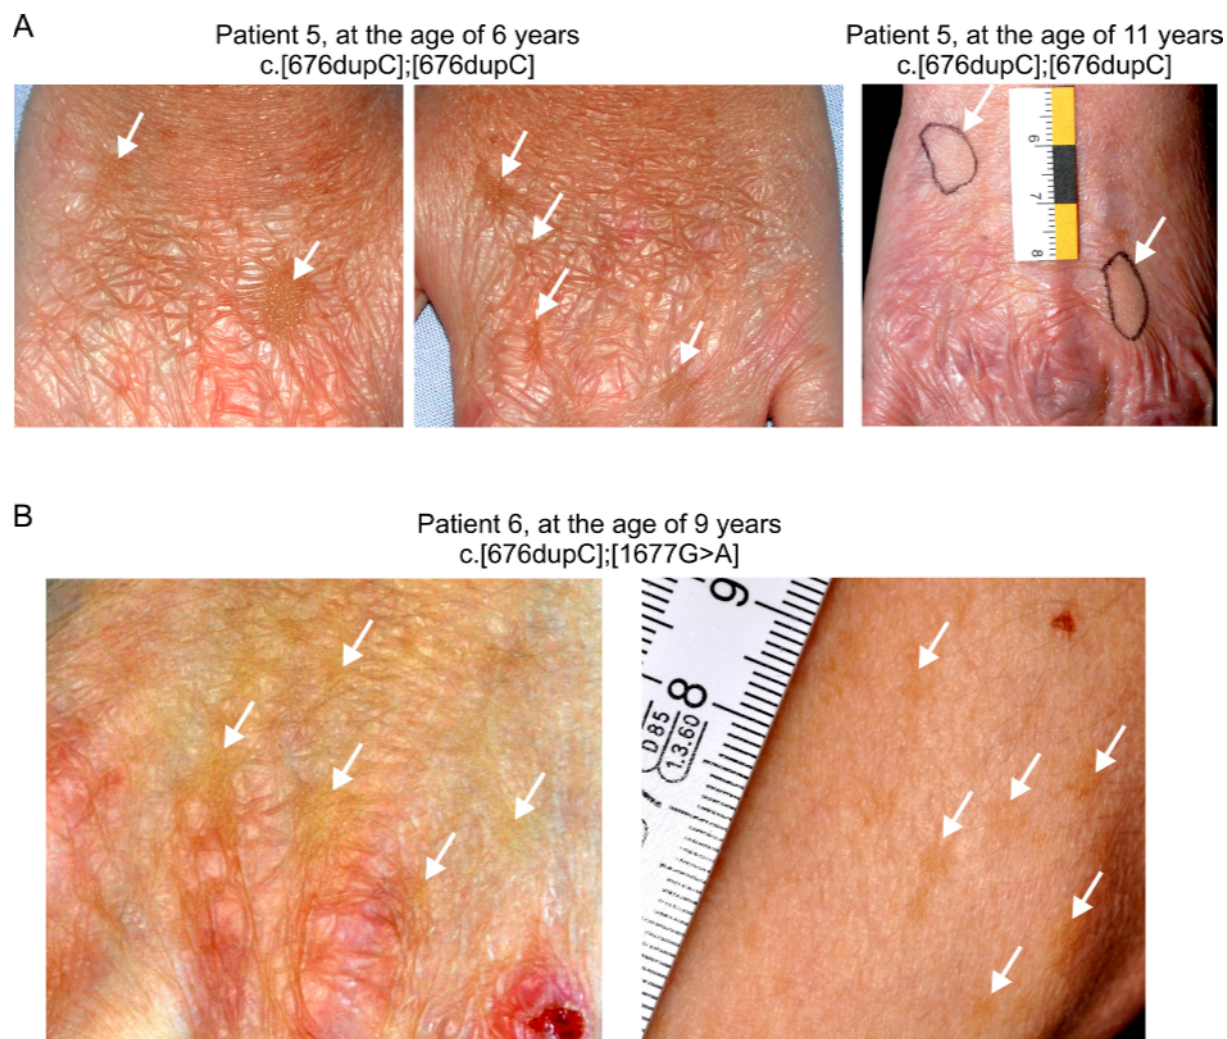

**Supplemental Figure 2. Clinical evidence for revertant mosaicism in patients 5 and 6, two children with KS. (A)** Patient 5 has been observed since early infancy. The revertant patches were first recognizable at the age of 3 years at the same sites. The hands of patient 5 at the age of 6 years (left and middle panels), and the right hand at the age of 11 years (right panel) are shown. Revertant mosaicism was supported by the stable presence of the marked areas on the right hand. They seem to grow with the child's hand. **(B)** Right hand and left elbow of the 9-year-old patient 6 exhibit multiple normal-appearing, slightly hyperpigmented, skin patches with restored skin texture and absence of atrophy. Further clinical features are listed in Table 1. In each picture, the age at examination and the inherited *FERMT1* mutations are indicated. Areas with clinical features of reversion, namely normal skin texture and absence of skin atrophy, are pointed out by white arrows.
